# Supplementary material for: Integrated multiomics analysis highlights the immunosuppressive role of granulin precursor positive macrophages in hepatocellular carcinoma
Source: PeerJ journal article supplement (doi:10.7717/peerj.18879), 2025-02-21
Supplement: Rawdata_of_PCR.xlsx [file Rawdata_of_PCR.xlsx]

## Sheet: Sheet1
	NC			GRN					NC+IL-4					GRN+IL-4
actin	18.2			17.5					18.3					19.2
	18.5			17.2					18.5					19.3
	18.9			17.3					18.9					19.7
GRN	23.8	5.6		20.2	2.7	-2.9	7.46426		20.7	2.4	-3.2	9.18959		16.3	-2.9	-8.3	315.173		0.000698941
	23.9	5.4		19.8	2.6	-2.8	6.9644		20.8	2.3	-3.1	8.57419		16.9	-2.4	-8	256
	23.5	4.6		19.4	2.1	-2.5	5.65685		20.1	1.2	-3.4	10.5561		16.5	-3.2	-7.8	222.861
							1					1					1
CD163	21.2	3		20.8	3.3	0.3	0.812252		18.8	0.5	-2.5	5.65685		19.2	0	-3	8
	21.9	3.4		20.9	3.7	0.3	0.812252		19.4	0.9	-2.5	5.65685		19.8	0.5	-2.9	7.46426		0.000823845
	21.5	2.6		20.2	2.9	0.3	0.812252		18.9	0	-2.6	6.06287		19.3	-0.4	-3	8
							1					1					1
TGFB1	25.4	7.2		24.8	7.3	0.1	0.933033		23.5	5.2	-2	4		23.2	4	-3.2	9.18959		0.00295079
	25.9	7.4		24.6	7.4	0	1		23.7	5.2	-2.2	4.59479		23.8	4.5	-2.9	7.46426
	26.1	7.2		24.7	7.4	0.2	0.870551		23.8	4.9	-2.3	4.92458		23.7	4	-3.2	9.18959
							1					1					1
IL-10	19.8	1.6		19.2	1.7	0.1	0.933033		18.4	0.1	-1.1	2.14355		18.4	-0.8	-2.4	5.27803		0.000492204
	19.5	1		18.8	1.6	0.6	0.659754		18.9	0	-1.2	2.2974		17.7	-1.6	-2.6	6.06287
	20.1	1.2		18.2	0.9	-0.3	1.23114		18.5	0	-1	2		18.2	-1.5	-2.7	6.49802

## Sheet: Sheet2
unstimulated	NC	GRN
18.9	187.7	143.8
23.5	164.4	137.6
22.1	172.9	145.3
