# Supplementary material for: Integrated multiomics analysis highlights the immunosuppressive role of granulin precursor positive macrophages in hepatocellular carcinoma
Source: PeerJ journal article supplement (doi:10.7717/peerj.18879), 2025-02-21
Supplement: supplementary_materials.docx [file supplementary_materials.docx]

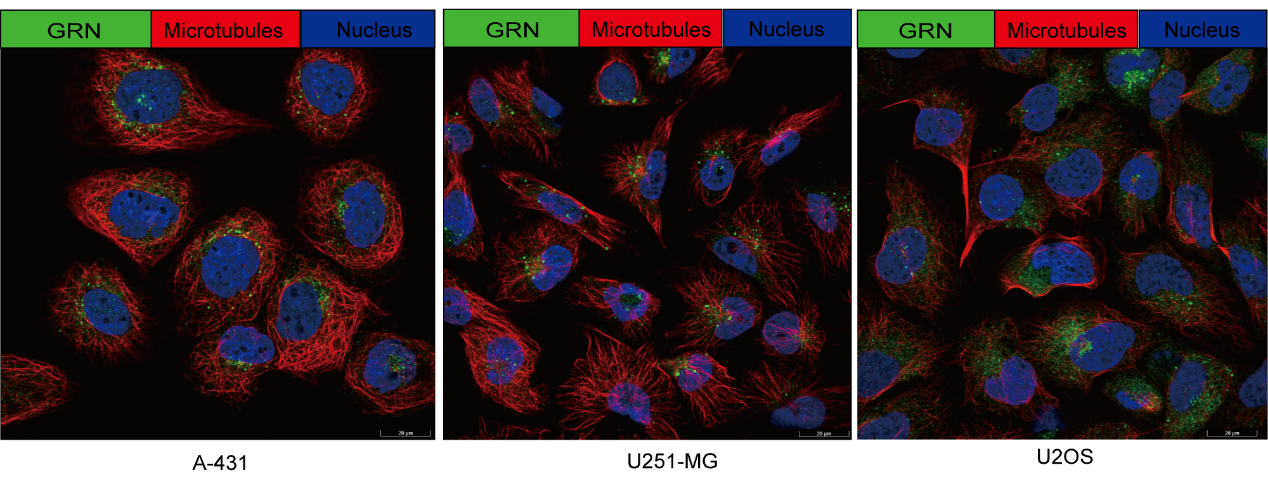


Figure S1. Immunofluorescence showed subcellular localization of GRN using the HPA online tool (https://www.proteinatlas.org/).


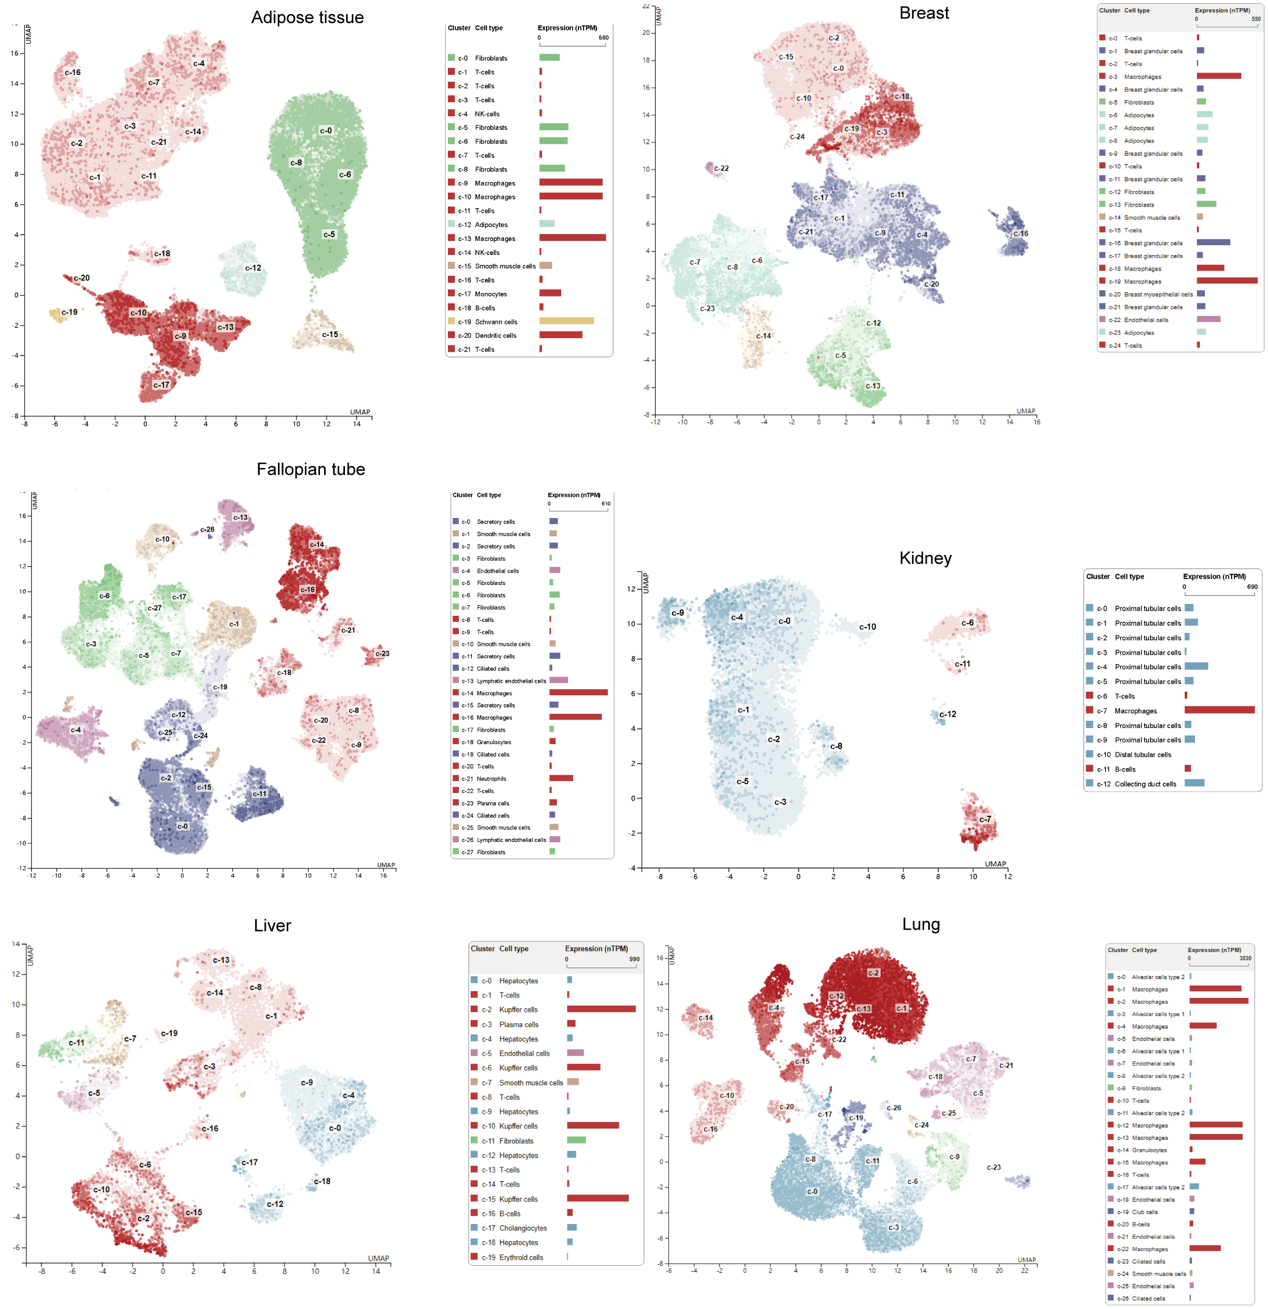


Figure S2. GRN expression in different cell types from various normal tissues including adipose, breast, fallopian tube, liver, and lung sing the scRNA-seq datasets from HPA online tool (https://www.proteinatlas.org/).


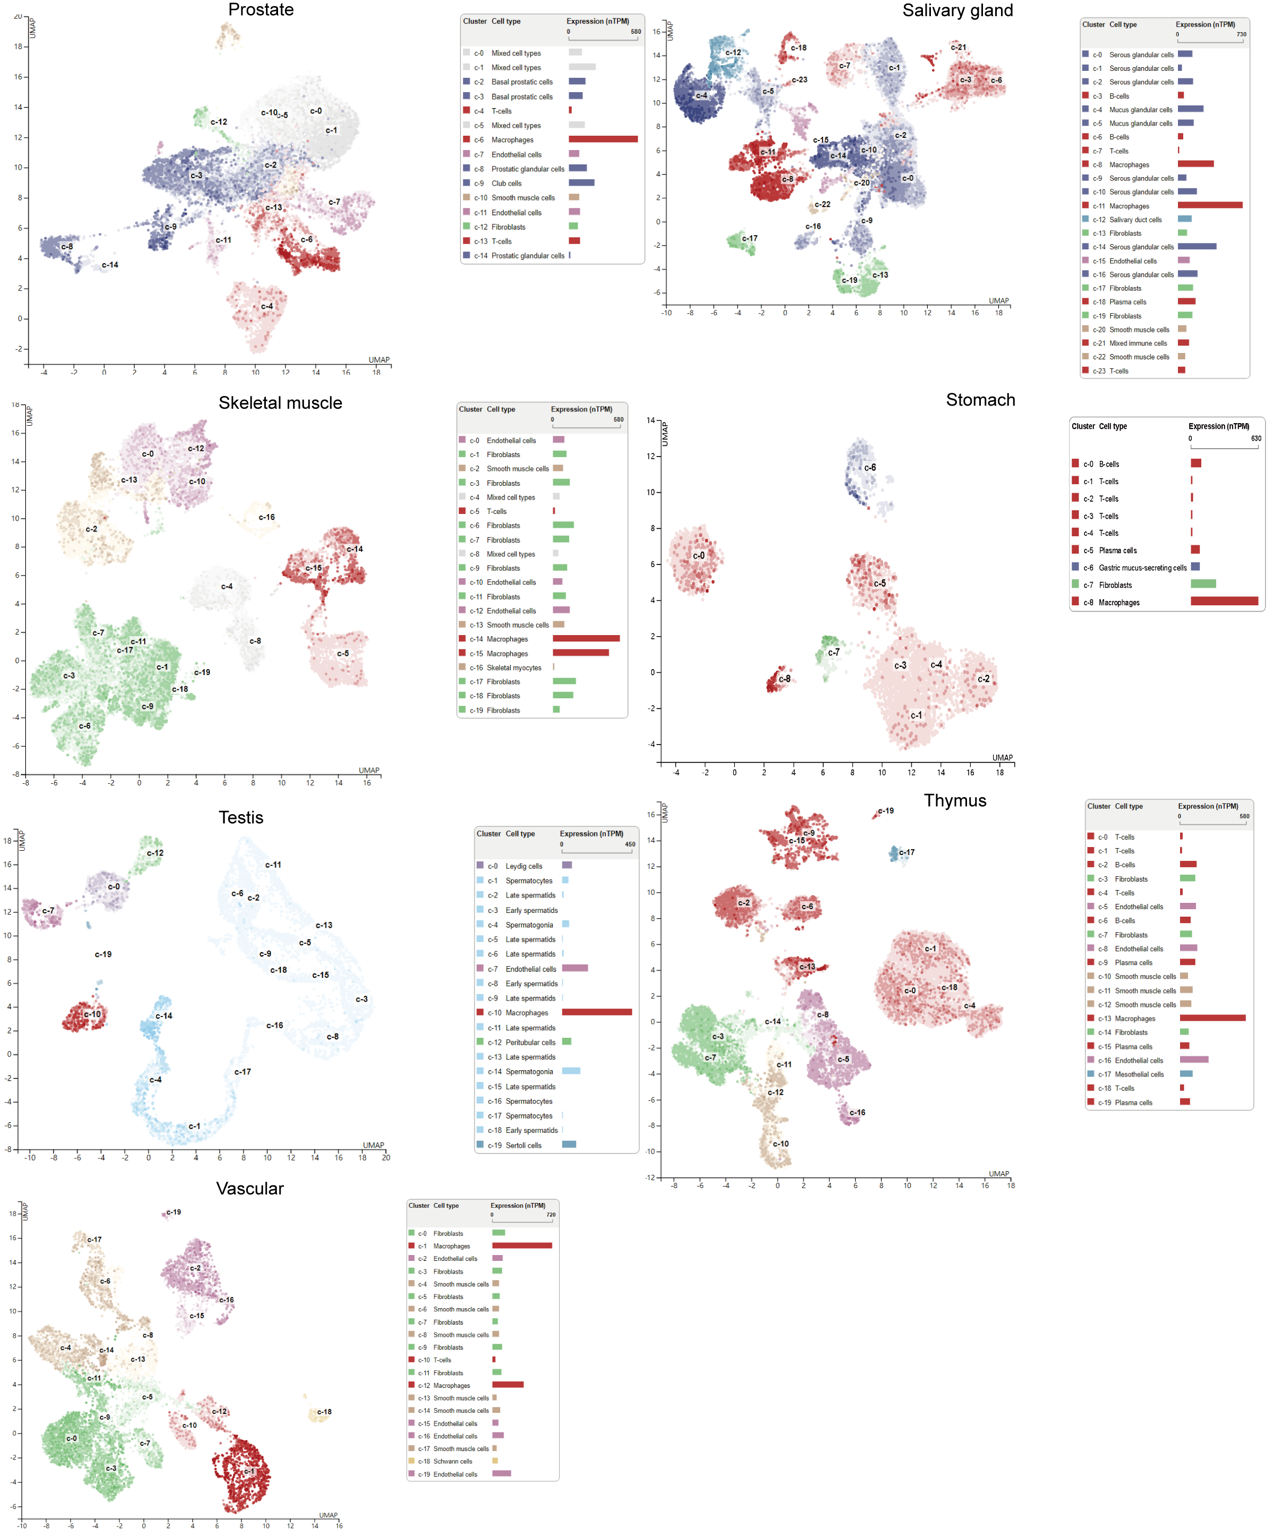


Figure S3. GRN is selectively expressed by macrophages in the indicated non-cancer tissues and organs using the scRNA-seq datasets from HPA online tool.


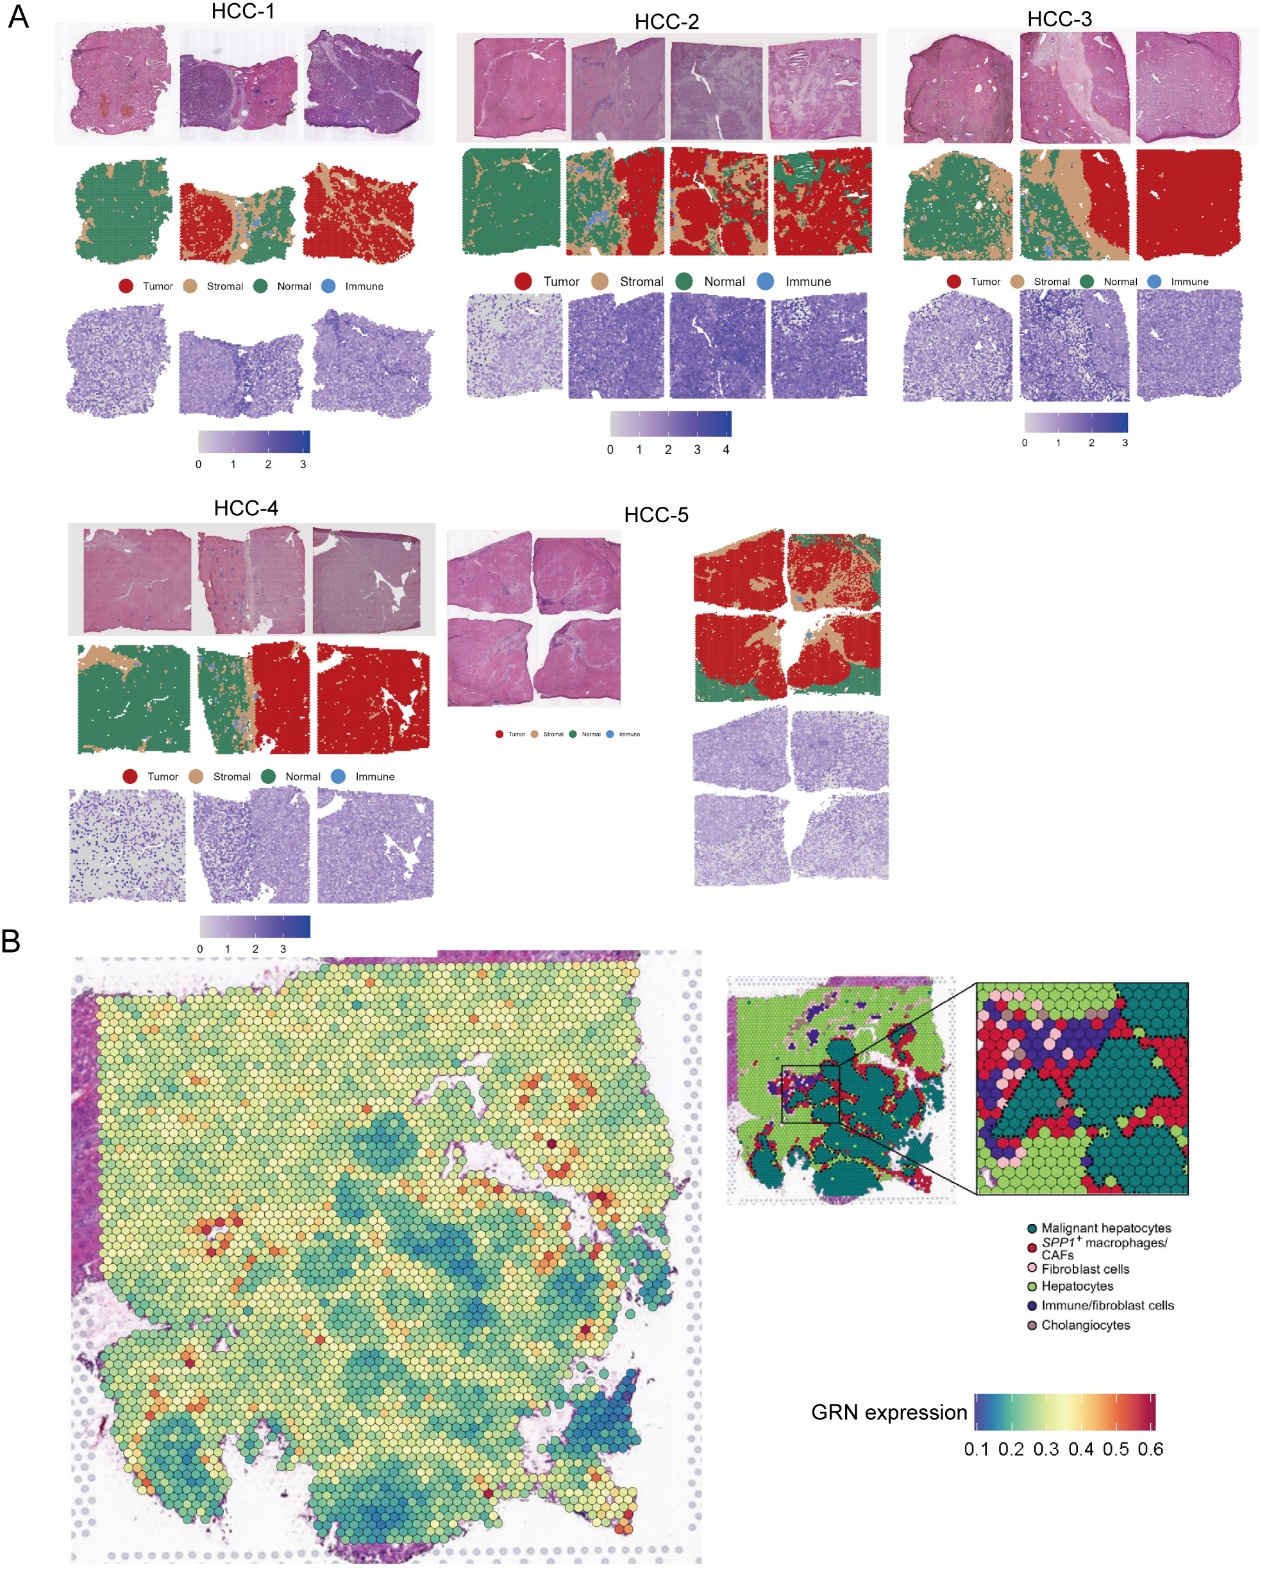


Figure S4. GRN was highly expressed in HCC, particularly in the stroma area between HCC tissues and adjacent non-tumor tissues. A. H&E staining, cell type maps, and gene count maps of different sites in samples from patients with liver cancer (HCC-1, HCC-2, HCC-3, HCC-4, and HCC-5) using spatial transcriptomics from HCCDB online tool (http://lifeome.net:809/#/home). B. Unbiased clustering of spatial transcriptomics spots, definition of cell types of each cluster, and GRN expression among different cell types in ICB-treated non-responders’ tumor tissues.


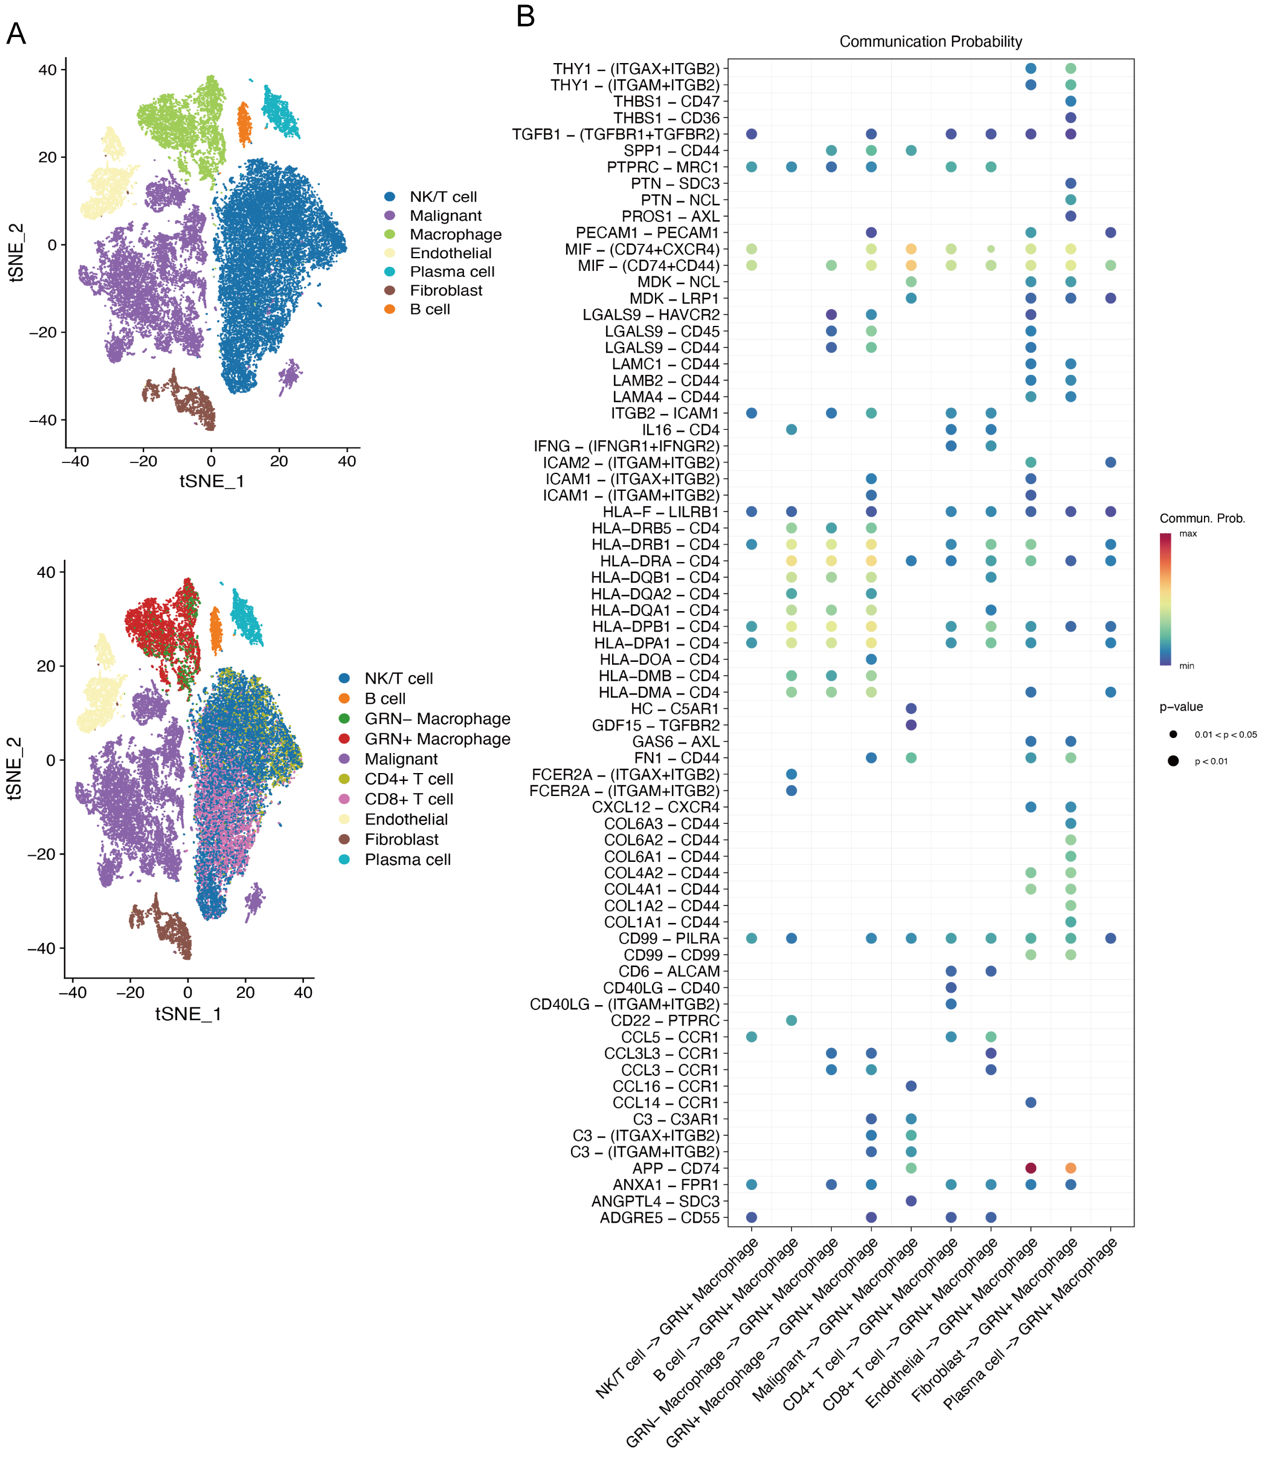


Figure S5. GRN+ macrophages communicate with other immune cell subgroups in HCC. A. t-SNE projection of single cells derived from 25 HCC patients (GSE151530) colored by cell clusters. B. Bubble plot showing the significant ligand–receptor pairs between other cell types and GRN+ macrophages calculated by Cellchat using scRNA-seq data (GSE15130).


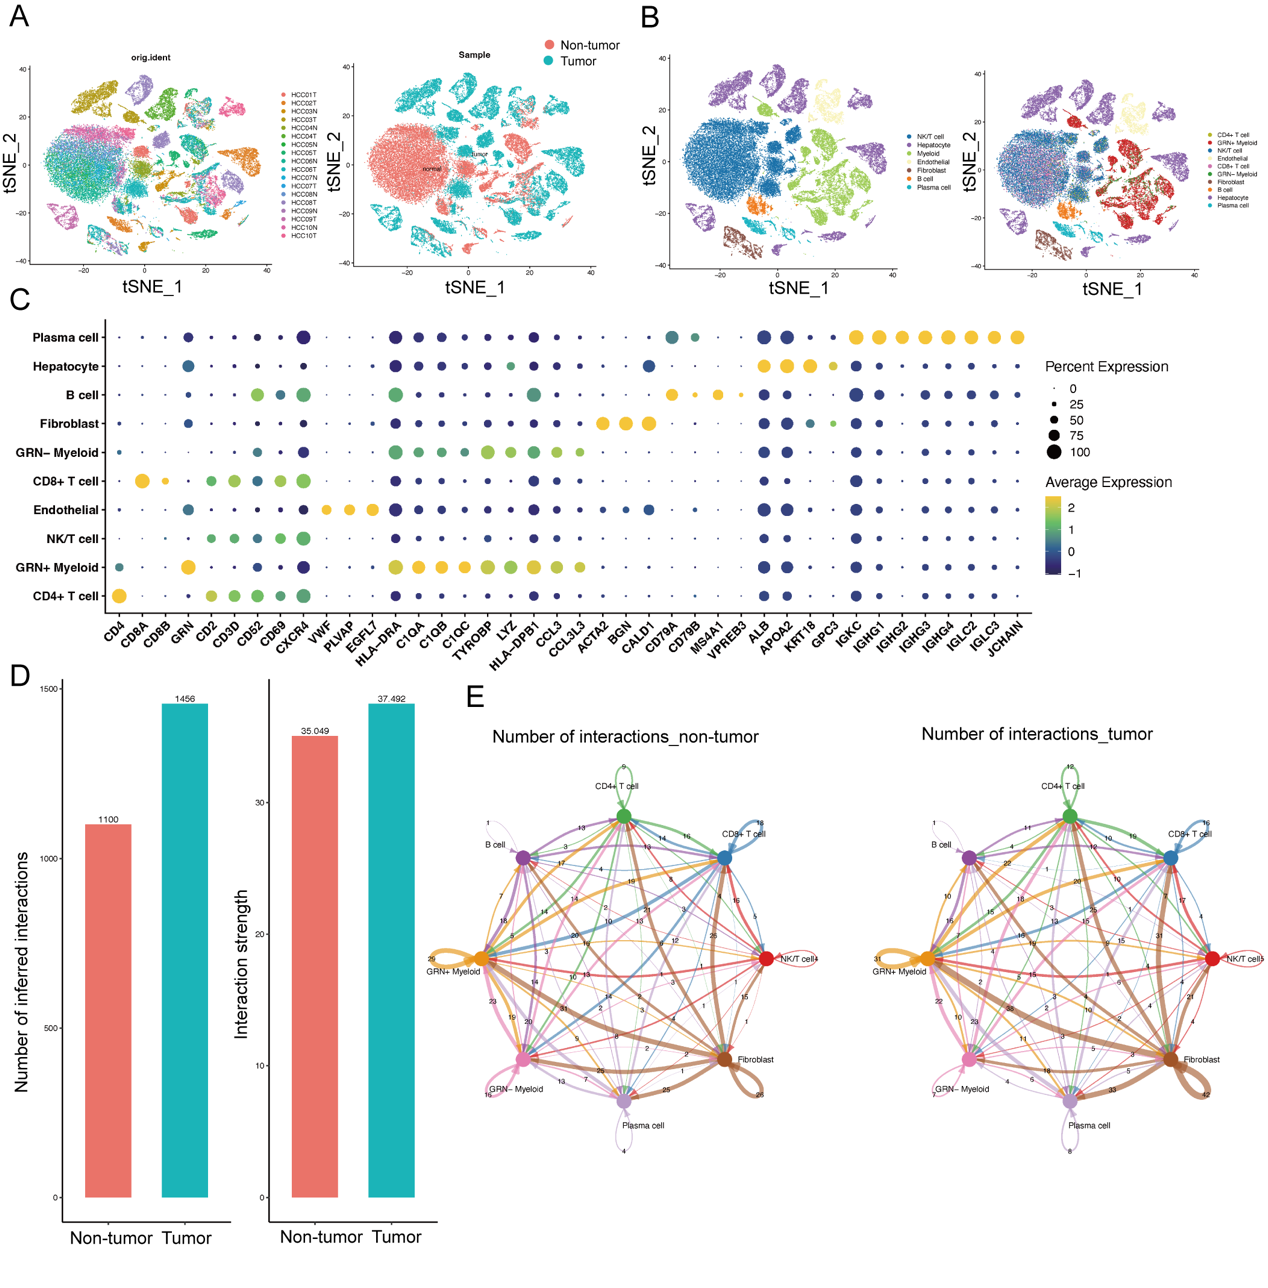


Figure S6. GRN+ Myeloid cells communicate with other immune cell subgroups in HCC and adjacent non-tumor tissues.

A-B. t-SNE projection of single cells derived from 10 HCC patients (GSE149614) colored by tissue origin (A) and cell clusters (B). C. Bubble heatmap depicting the expression levels of cluster-specific marker genes. The dot size indicates the fraction of expressing cells, and dots are colored based on average expression levels. D. The cell–cell interaction numbers between GRN+ Myeloid cells and other cell types from non-tumor tissues and HCC tissues. E. The cell–cell interactions between GRN+ Myeloid cells and other cell types indicated by the scRNA-seq data.


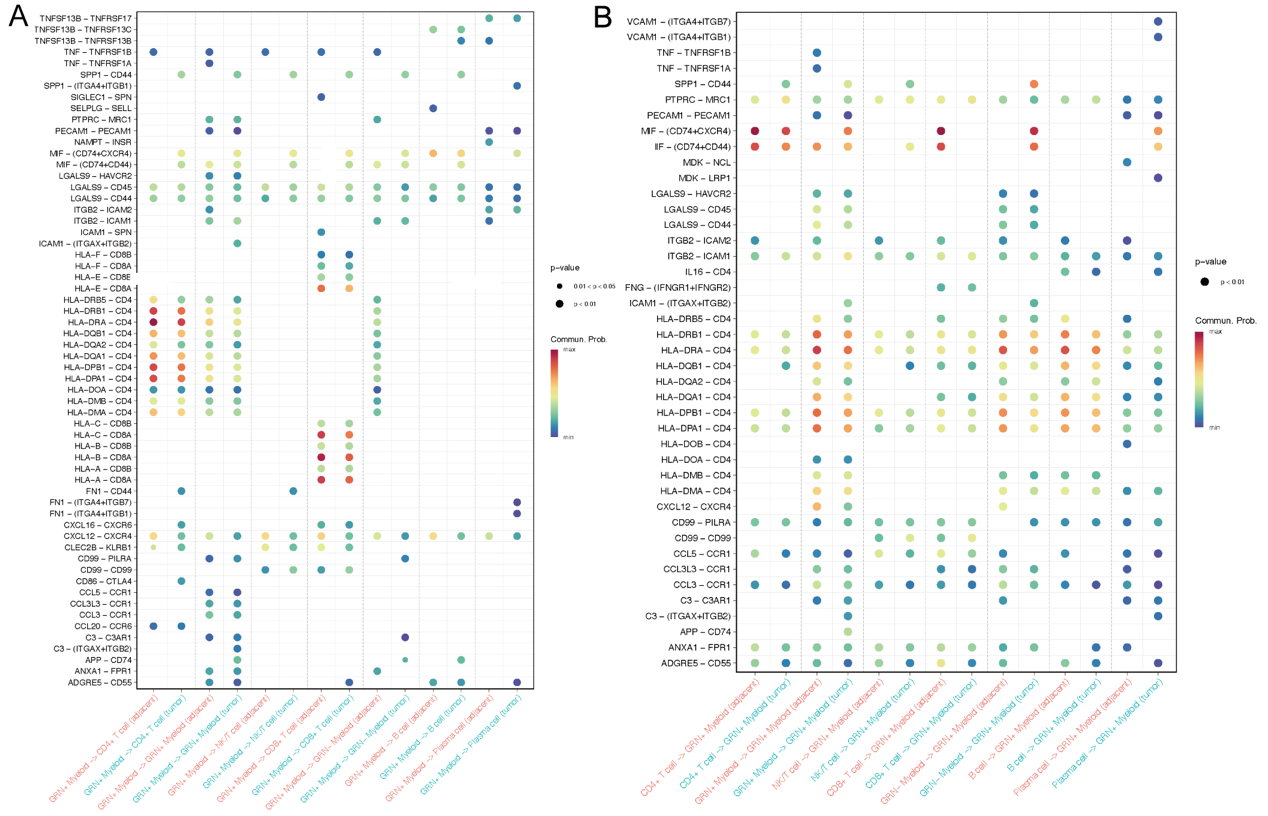


Figure S7. Tignificant ligand–receptor pairs between GRN+ Myeloid cells and other cell types calculated by Cellchat using scRNA-seq data (GSE149614).

**Supplementary Table S1**

Primer sequence used in this study

| Gene | sequence |
| --- | --- |
| GRN-F | 5′ CGGCCACTCCTGCATCTTTA 3′ |
| GRN-R | 5′ CCCACGGAGTTGTTACCTGA 3′ |
| CD163-F | 5′ TTTGTCAACTTGAGTCCCTTCAC 3′ |
| CD163-R | 5′ TCCCGCTACACTTGTTTTCAC 3′ |
| TGFB1-F | 5′ CTGTACATTGACTTCCGCAAG 3′ |
| TGFB1-R | 5′ TGTCCAGGCTCCAAATGTAG 3′ |
| IL10-F | 5′ GAGGAGGTGATGCCCCAAGC 3′ |
| IL10-R  ACTB-F  ACTB-R | 5′ GGGAAGAAATCGATGACAGC 3′  5′ GGACTTCGAGCAAGAGATGG 3′  5′AGCACTGTGTTGGCGTACAG 3′ |
